# Supplementary material
Source: Springer Nature journal article supplement (https://www.springermedizin.de/resource/supplementary/12889_2014_6858_MOESM2_ESM.pdf/9499194)

Figure 2

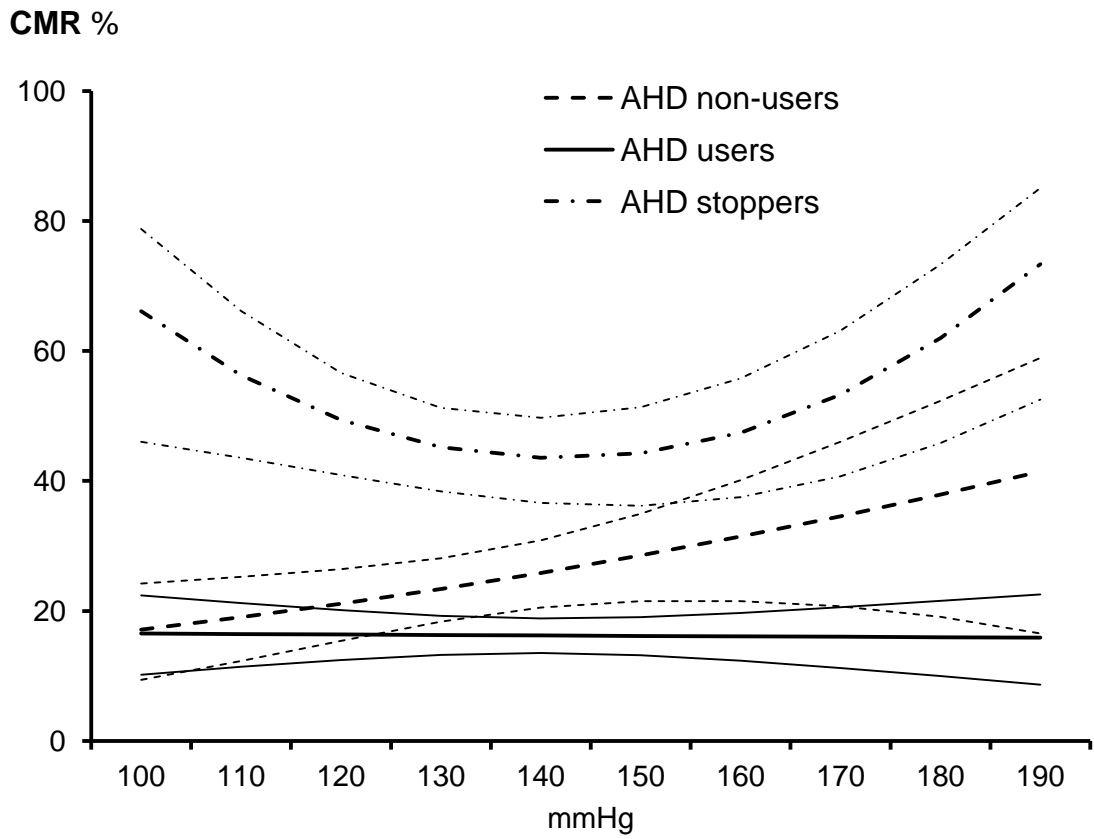

Supplement: MOESM2 [file 9499194]
